# Supplementary material
Source: publisher site journal article supplement (https://www.dovepress.com/article/450388)
Supplement: Supplementary file 1 [file get_supplementary_file.php]

Supplementary Table 1. Linear regression analysis of annual eGFR changes in three groups with negative urine protein

|  | Regression coefficient | 95% CI | *P* |
| --- | --- | --- | --- |
| Constant | 123.24 | 100.09~146.39 | <0.001 |
| K group | -18.26 | -27.71~-8.81 | <0.001 |
| NK group | -11.64 | -17.46~-5.83 | <0.001 |
| H group | Ref. |  |  |
| GLU | -0.88 | -1.72~-0.32 | 0.042 |
| HbA1c | -1.67 | -3.17~-0.17 | 0.030 |
| LDL-c | -0.03 | -1.62~1.56 | 0.970 |
| UA | -0.02 | -0.03~-0.00 | 0.014 |
| ALB | -0.50 | -1.00~-0.01 | 0.051 |
| SBP | -0.13 | -0.20~-0.06 | <0.001 |

ALB：albumin； GLU：glucose；HbA1c：glycosylated hemoglobin；LDL-c：low density lipoprotein cholesterol； UA：uric acid； UP：urine protein；SBP：systolic pressure.
